# Supplementary material for: Influence of the R-substituents on the properties of [Ni(R2pipdt)(dmit)] complexes and crystal structure where R = CH2C6H5
Source: Royal Society of Chemistry journal article supplement (doi:10.1039/b712243h), 2007-01-01
Supplement: b712243h.pdf [file b712243h.pdf]

---

## Influence of the R-substituents on the Properties of [Ni(R<sub>2</sub>pipdt)(dmit)] Complexes and Crystal Structure where R = CH<sub>2</sub>C<sub>6</sub>H<sub>5</sub>

---

Elaine A. M. Geary,<sup>a</sup> Lesley J. Yellowlees,<sup>a</sup> Simon Parsons,<sup>a</sup> Luca Pilia,<sup>b</sup> Angela Serpe,<sup>b</sup> M. Laura Mercuri,<sup>b</sup> Paola Deplano,<sup>\*b</sup> Stewart J. Clark<sup>c</sup> and Neil Robertson<sup>\*a</sup>

<sup>a</sup> School of Chemistry, University of Edinburgh, King's Buildings, West Mains Road, Edinburgh EH9 3JJ, UK. Fax: +44 131 6504743; Tel: +44 131 6504755; E-mail: neil.robertson@ed.ac.uk

<sup>b</sup> Dipartimento di Chimica Inorganica e Analitica, S. S. 554, Bivio per Sestu, 09042 Monserrato, Cagliari, Italy. Fax: +39 070 6754456; Tel: +39 070 4486; E-mail: deplano@unica.it; mercuri@unica.it

<sup>c</sup> Department of Physics, University of Durham, South Road, Durham DH1 3LE, UK

### Supplementary Information

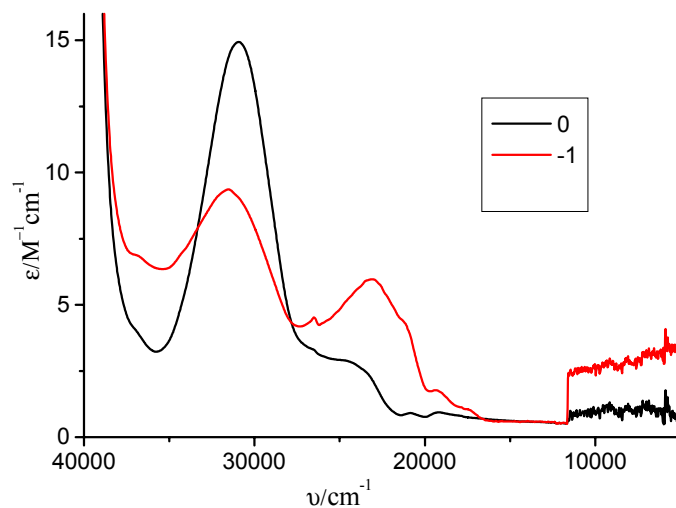

**Fig. S1** UV/visible spectra of **1a**<sup>0/1-</sup> in 0.1 M TBABF<sub>4</sub>/DMF at 213 K. E<sub>gen</sub> = 0.00 V(0), -1.70 V(-1)

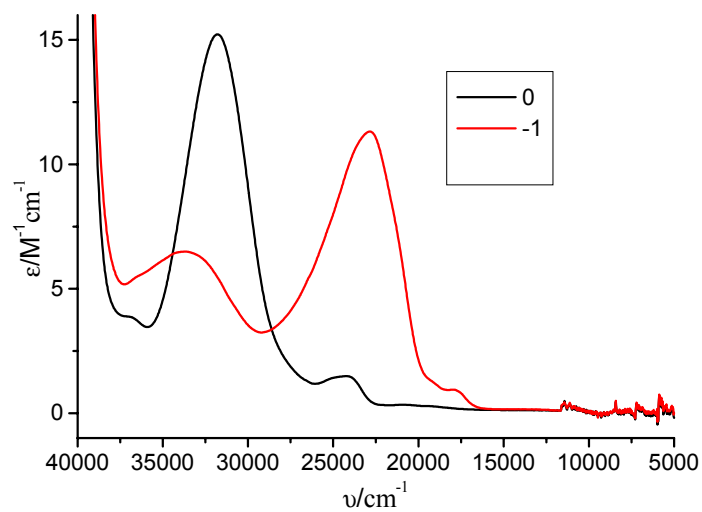

**Fig. S2** UV/visible spectra of  $2a^{0/1-}$  in 0.1 M TBABF<sub>4</sub>/DMF at 213 K.  $E_{\text{gen}} = 0.00 \text{ V}(0)$ , -  
1.70 V(-1)

**Table S1** Peaks observed in the UV/visible spectra for **1a** and **2a** in their neutral and monoanion states at 213 K.  $\epsilon/M^{-1}\text{cm}^{-1}$  are given in brackets.

| Compound  | neutral, $\nu/\text{cm}^{-1}$<br>( $\epsilon/M^{-1}\text{cm}^{-1}$ ) | monoanion, $\nu/\text{cm}^{-1}$<br>( $\epsilon/M^{-1}\text{cm}^{-1}$ ) |
|-----------|----------------------------------------------------------------------|------------------------------------------------------------------------|
| <b>1a</b> | 30,900 ( $14.9 \times 10^3$ )<br>24,100 ( $2.8 \times 10^3$ )        | 31,500 ( $9.4 \times 10^3$ )<br>23,200 ( $6.0 \times 10^3$ )           |
| <b>2a</b> | 31,800 ( $15.2 \times 10^3$ )<br>24,300 ( $1.5 \times 10^3$ )        | 33,800 ( $6.5 \times 10^3$ )<br>22,800 ( $11.3 \times 10^3$ )          |

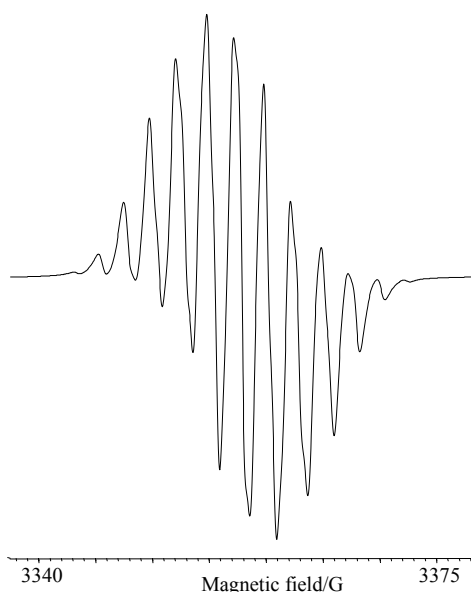

Fig. S3: Simulated EPR spectrum of  $1a^{1-}$  using the parameters given in table 3.

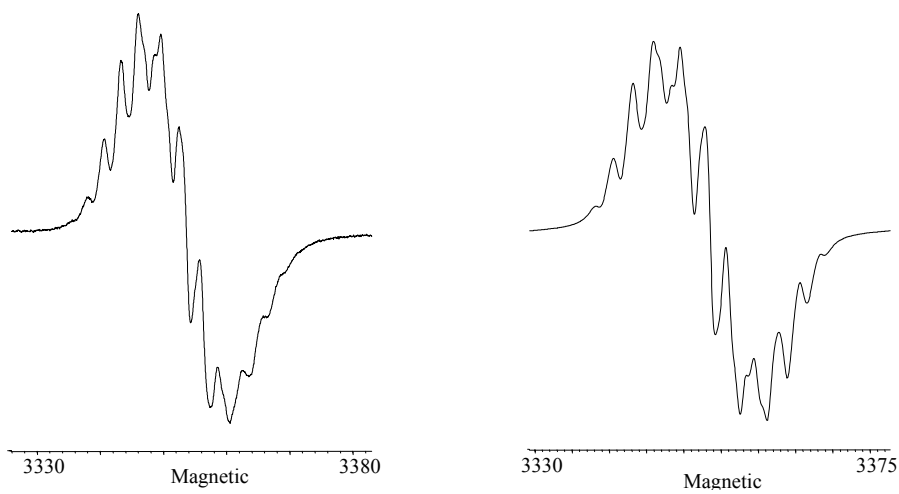

Fig. S4: Left - EPR spectrum of  $1b^-$  in solution of 0.1 M TBABF<sub>4</sub> in DMF at 293 K.  $E_{\text{gen}} = -1.50$  V; Right – Simulated EPR spectrum of  $1b^-$  using the parameters given in table 3

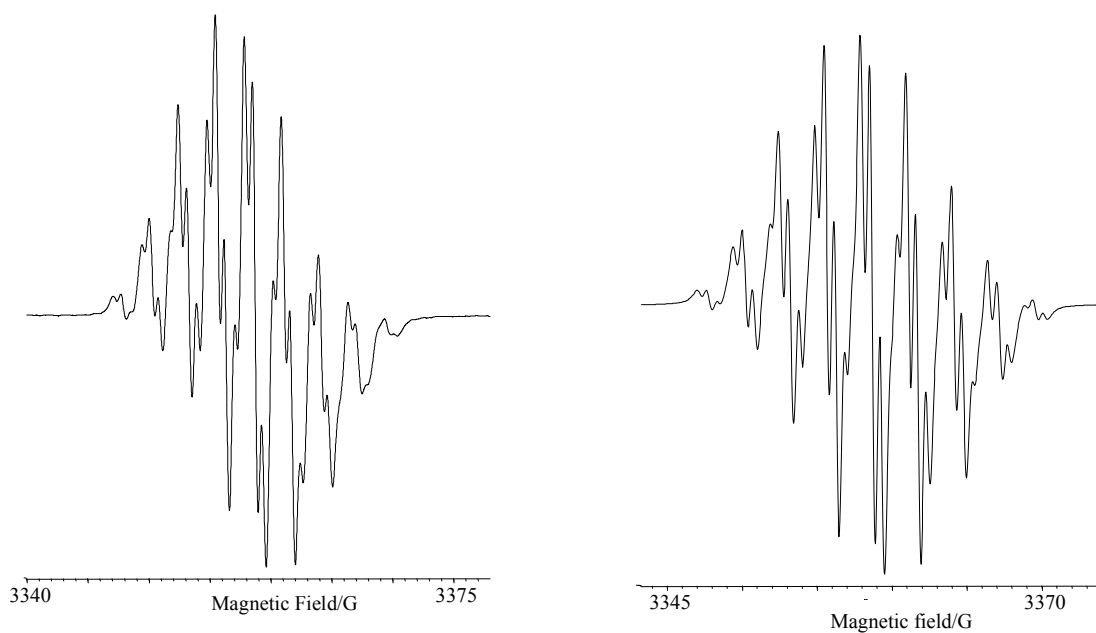

Fig. S5: Left - EPR spectrum of  $2a^-$  in solution of 0.1 M TBABF<sub>4</sub> in DMF at 293 K.  $E_{\text{gen}} = -1.70$  V; Right – Simulated EPR spectrum of  $2a^-$  using the parameters given in table 4

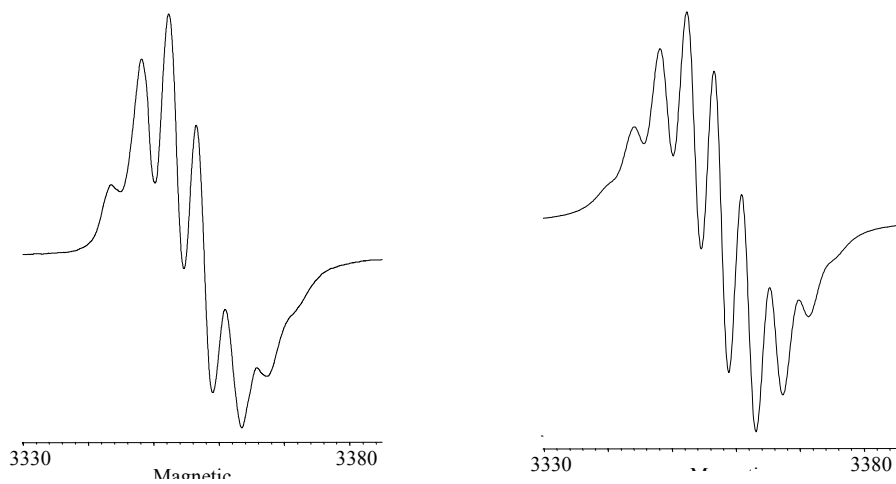

Fig. S6: Left – EPR spectrum of  $2b^-$  in solution of 0.1 M TBABF<sub>4</sub> in DMF at 233 K.  $E_{\text{gen}} = -1.00$  V; Right – Simulated EPR spectrum of  $2b^-$  using the parameters given in table 4
